# Supplementary material
Source: PubMed Central journal article supplement (PMC7134565)
Supplement: NIHMS1540586-supplement-315005_Acknowledgment_Permissions.pdf [file NIHMS1540586-supplement-315005_Acknowledgment_Permissions.pdf]

## **circres**

---

**From:** Shallenberger, Lucy H <lshalle@emory.edu>  
**Sent:** Friday, September 13, 2019 1:00 PM  
**To:** circres  
**Subject:** FW: [External] Circulation Research Decision on Ms # CIRCRES/2019/315005R2

\*\*\* **CAUTION:** This email originated from outside of the **American Heart Association**. Do **not** click links or open attachments unless you recognize the sender and know the content is safe. \*\*\*

To whom it may concern,

I am giving my permission to be acknowledged in the below manuscript.

Thanks,  
Lucy

Lucy Shallenberger  
Public Health Program Asc, Sr  
404-712-8267 phone  
404-712-8392 fax  
[lshalle@emory.edu](mailto:lshalle@emory.edu)

### CONFIDENTIALITY NOTICE:

This message, including any attachments, may contain legally confidential and privileged information and is intended only for the named recipient/recipients. No one else is authorized to read, disseminate, distribute, copy or otherwise disclose the contents of this message. If you have received this message in error, please notify the sender immediately by email or telephone and delete the message in its entirety.

---

**From:** [CircRes@circresearch.org](mailto:CircRes@circresearch.org) <[CircRes@circresearch.org](mailto:CircRes@circresearch.org)>  
**Sent:** Friday, September 13, 2019 12:34 PM  
**To:** Quyyumi, Arshed Ali <[aquyyum@emory.edu](mailto:aquyyum@emory.edu)>  
**Cc:** Kim, Jeong Hwan <[jeonghwan.kim@emory.edu](mailto:jeonghwan.kim@emory.edu)>; Almuwaqqat, Zakaria <[zakaria85@emory.edu](mailto:zakaria85@emory.edu)>; Hammadah, Muhammad <[muhammad.hammadah@emory.edu](mailto:muhammad.hammadah@emory.edu)>; Liu, Chang <[chang.liu2@emory.edu](mailto:chang.liu2@emory.edu)>; Ko, Yi-An <[yi-an.ko@emory.edu](mailto:yi-an.ko@emory.edu)>; Lima, Bruno Bezerra <[bruno.bezerra.lima@emory.edu](mailto:bruno.bezerra.lima@emory.edu)>; Sullivan, Samaah <[samaah.sullivan@emory.edu](mailto:samaah.sullivan@emory.edu)>; Alkhoder, Ayman <[ayman.alkhoder@emory.edu](mailto:ayman.alkhoder@emory.edu)>; Abdalbaki, Rami <[rami.abdalbaki@emory.edu](mailto:rami.abdalbaki@emory.edu)>; Ward, Laura <[ltrompa@emory.edu](mailto:ltrompa@emory.edu)>; Bremner, J. Douglas <[doug.bremner@emory.edu](mailto:doug.bremner@emory.edu)>; [shepsds@gmail.com](mailto:shepsds@gmail.com) <[shepsds@gmail.com](mailto:shepsds@gmail.com)>; [raggip@gmail.com](mailto:raggip@gmail.com) <[raggip@gmail.com](mailto:raggip@gmail.com)>; Sun, Yan <[yan.v.sun@emory.edu](mailto:yan.v.sun@emory.edu)>; Shah, Amit <[ajshah3@emory.edu](mailto:ajshah3@emory.edu)>; Vaccarino, Viola <[lvaccar@emory.edu](mailto:lvaccar@emory.edu)>  
**Subject:** [External] Circulation Research Decision on Ms # CIRCRES/2019/315005R2

September 13, 2019

Dr. Arshed A. Quyyumi  
Emory University School of Medicine  
Emory Clinical Cardiovascular Research Institute  
1462 Clifton Road NE, Suite 507

## **circres**

---

**From:** Hartsfield, D. Joy <djharts@emory.edu>  
**Sent:** Friday, September 13, 2019 1:02 PM  
**To:** circres  
**Subject:** Article CIRCRES/2019/315005R2

**\*\*\* CAUTION:** This email originated from outside of the **American Heart Association**. Do **not** click links or open attachments unless you recognize the sender and know the content is safe. **\*\*\***

RE: CIRCRES/2019/315005R2: Peripheral Vasoconstriction during Mental Stress and Adverse Cardiovascular Outcomes in Patients with Coronary Artery Disease

has listed or used data provided by myself, I freely give my permission to be listed as a contributor.  
Sent via email on 09/13/2019 @ 13:02 EST.

D. Joy Hartsfield

**D. Joy Hartsfield**  
School of Medicine  
Emory University  
Research Administrative Coordinator  
Genebank, MIMS, Twins  
MECA with Morehouse SOM  
404-712-7847, landline only

---

This e-mail message (including any attachments) is for the sole use of the intended recipient(s) and may contain confidential and privileged information. If the reader of this message is not the intended recipient, you are hereby notified that any dissemination, distribution or copying of this message (including any attachments) is strictly prohibited.

If you have received this message in error, please contact the sender by reply e-mail message and destroy all copies of the original message (including attachments).

## **circres**

---

**From:** Murrah, Nancy <nancy.murrah@emoryhealthcare.org>  
**Sent:** Friday, September 13, 2019 1:14 PM  
**To:** circres  
**Subject:** FW: [External] Circulation Research Decision on Ms # CIRCRES/2019/315005R2

**\*\*\* CAUTION:** This email originated from outside of the **American Heart Association**. Do **not** click links or open attachments unless you recognize the sender and know the content is safe. **\*\*\***

To whom it may concern,

I am giving my permission to be acknowledged in the below manuscript.

Nancy VC Murrah RN,BSN  
Supervisor Senior Research Nurse  
Emory Program in Cardiovascular Outcomes Research and Epidemiology- EPICORE  
Emory School of Public Health & Emory School of Medicine Cardiology  
ph: 404.727.4709  
page: 404.686.5500 pic 15793  
<http://www.eccri.emory.edu/conference/cardio-conf.html>  
<https://www.sph.emory.edu/departments/epi/research/centers/epicore/index.html>

email or telephone and delete the message in its entirety.

**Subject:** [External] Circulation Research Decision on Ms # CIRCRES/2019/315005R2

September 13, 2019

Dr. Arshed A. Quyyumi  
Emory University School of Medicine  
Emory Clinical Cardiovascular Research Institute  
1462 Clifton Road NE, Suite 507  
Atlanta, GA 30322

RE: CIRCRES/2019/315005R2: Peripheral Vasoconstriction during Mental Stress and Adverse Cardiovascular Outcomes in Patients with Coronary Artery Disease

Dear Dr. Quyyumi:

Your manuscript has been carefully evaluated by the editors as a Regular Article. While we are interested in your paper, further minor revision is required before we can accept the manuscript for publication in Circulation Research. Specifically, there are several formatting issues that need to be addressed. Please submit your revision by WEDNESDAY, SEPTEMBER 18.

please ensure that your manuscript adheres to the AHA Journals' implementation of the Transparency and Openness Promotion (TOP) Guidelines (available online at <http://www.ahajournals.org/content/TOP-guidelines>).

For examples, please see

<http://www.ahajournals.org/content/TOP-guidelines/ExampleDisclosures>.

Please ascertain that your revised manuscript adheres to the Instructions to Authors as they appear online at <https://www.ahajournals.org/res/author-instructions>. Accepted manuscripts are published online ahead of print, usually within 24 hours of acceptance. Therefore, when submitting the final files of the manuscript and figures, please ensure you have made any essential changes or corrections to content, grammar, and formatting. Please also ensure that author information provided in the online submission system is correct, including author order, proper names, and institutions. Once published ahead of print, you will be unable to make any revisions to the manuscript until you receive your author proofs from the publisher and any changes made to proofs will be reflected in the final print and online journal version of your article.

As your article may be published online immediately upon acceptance, neither the Editorial Office nor the AHA will be responsible for any consequences with regard to intellectual property rights. To safeguard their intellectual property, authors should ensure that appropriate reports of invention and patent applications have been filed before the manuscript is accepted. If you should need to delay publication of your article for any reason, please let the Editorial Office know as soon as possible.

Please provide/address the following areas:

#### Manuscript Text:

- Please be sure to provide your manuscript text in an editable Word Doc file containing all sections of the manuscript, including tables and figure legends. Tables should be embedded within the body of the text as they are mentioned to ensure proper ordering of references.
- Please include a Novelty and Significance section at the end of your Word file. Instructions for the Novelty and Significance section can be found at <https://www.ahajournals.org/res/revised-accepted-manuscripts>.
- Authors are encouraged to provide a detailed, expanded Methods section as an online data supplement, especially if word limit constraints do not allow you to provide a detailed Methods section in the main manuscript. Methods sections should be detailed enough to enable readers to replicate the experiments without consulting previous articles. Note that the online data supplement must contain its own independent reference section.

#### Figures:

- Provide one full set of publication-quality figures as electronic files. Please ensure that electronic figure files are in tiff format and RGB color scale. Color and half-tone figures must have at least 600 dpi resolution; line drawings must have a 1200 dpi resolution or their original file format, such as PowerPoint. Online figures should be provided only in PDF format as part of the online supplement file.
- Color figure charges are a flat per page rate of \$653 per color page.
- Please note that color figures cannot be changed to black and white after the manuscript is accepted. Please make any color changes to your figures during the final revision.

#### Online Supplement:

- Upload the online data supplement as one complete PDF labeled "Supplemental Material" at the top of the first page.
- Rename the supplemental figures and/or table with Roman numerals (i.e., Online Figure I, Online Table I, Online Figure II, Online Table II, etc.). Ensure that this change is made on the display item itself, in the legend, and throughout the text.

#### Other Items:

- All persons acknowledged by name in the manuscript must send an email to [CircRes@circresearch.org](mailto:CircRes@circresearch.org) citing

their permission to be acknowledged.

-A Graphical Abstract (to be uploaded as a supplement): The intent of the graphical abstract is to provide readers with a succinct summary of the study in a form that facilitates its dissemination in presentations. It should emphasize the new findings in the paper. Do not include data items; all content should be graphical. The graphical abstract should conform to the following format: A single figure panel, no more than a 15 cm square (15 cm x 15 cm); Font: prefer a san serif font that is no less than 12 point. Please upload as a graphic abstract file in JPG file format.

- A supplement containing a short tweet that can be used to promote the article and a 1-2 line 'lay sentence' similar to those provided for NIH grants.

The Editors strongly encourage you to submit potential cover images. Appropriate figures should be both aesthetically beautiful and scientifically exciting. Potential cover images should be associated with the general topic of the paper, or may be altered/enhanced versions of an original figure within the manuscript. Potential cover figures should have a single panel, with no labels or text of any kind. The figure file should be supplied at exactly 8 1/8" width by 10 7/8" height. Please submit figure initially as a low-resolution PDF. Include a figure legend with the figure. If your figure is chosen, we will request a high-resolution version (minimum of 600 DPI, RGB color format, and TIF or EPS file format).

We look forward to receiving the final revised version of your manuscript as soon as possible. Thank you for contributing to Circulation Research.

Sincerely,

Jane E. Freedman, MD  
Editor-in-Chief  
Circulation Research  
An American Heart Association Journal

---

This e-mail message (including any attachments) is for the sole use of the intended recipient(s) and may contain confidential and privileged information. If the reader of this message is not the intended recipient, you are hereby notified that any dissemination, distribution or copying of this message (including any attachments) is strictly prohibited.

If you have received this message in error, please contact the sender by reply e-mail message and destroy all copies of the original message (including attachments).

Atlanta, GA 30322

RE: CIRCRES/2019/315005R2: Peripheral Vasoconstriction during Mental Stress and Adverse Cardiovascular Outcomes in Patients with Coronary Artery Disease

Dear Dr. Quyyumi:

Your manuscript has been carefully evaluated by the editors as a Regular Article. While we are interested in your paper, further minor revision is required before we can accept the manuscript for publication in Circulation Research. Specifically, there are several formatting issues that need to be addressed. Please submit your revision by WEDNESDAY, SEPTEMBER 18.

please ensure that your manuscript adheres to the AHA Journals' implementation of the Transparency and Openness Promotion (TOP) Guidelines (available online at <http://www.ahajournals.org/content/TOP-guidelines>).

For examples, please see

<http://www.ahajournals.org/content/TOP-guidelines/ExampleDisclosures>.

Please ascertain that your revised manuscript adheres to the Instructions to Authors as they appear online at <https://www.ahajournals.org/res/author-instructions>. Accepted manuscripts are published online ahead of print, usually within 24 hours of acceptance. Therefore, when submitting the final files of the manuscript and figures, please ensure you have made any essential changes or corrections to content, grammar, and formatting. Please also ensure that author information provided in the online submission system is correct, including author order, proper names, and institutions. Once published ahead of print, you will be unable to make any revisions to the manuscript until you receive your author proofs from the publisher and any changes made to proofs will be reflected in the final print and online journal version of your article.

As your article may be published online immediately upon acceptance, neither the Editorial Office nor the AHA will be responsible for any consequences with regard to intellectual property rights. To safeguard their intellectual property, authors should ensure that appropriate reports of invention and patent applications have been filed before the manuscript is accepted. If you should need to delay publication of your article for any reason, please let the Editorial Office know as soon as possible.

Please provide/address the following areas:

Manuscript Text:

- Please be sure to provide your manuscript text in an editable Word Doc file containing all sections of the manuscript, including tables and figure legends. Tables should be embedded within the body of the text as they are mentioned to ensure proper ordering of references.
- Please include a Novelty and Significance section at the end of your Word file. Instructions for the Novelty and Significance section can be found at <https://www.ahajournals.org/res/revised-accepted-manuscripts>.
- Authors are encouraged to provide a detailed, expanded Methods section as an online data supplement, especially if word limit constraints do not allow you to provide a detailed Methods section in the main manuscript. Methods sections should be detailed enough to enable readers to replicate the experiments without consulting previous articles. Note that the online data supplement must contain its own independent reference section.

Figures:

- Provide one full set of publication-quality figures as electronic files. Please ensure that electronic figure files

are in tiff format and RGB color scale. Color and half-tone figures must have at least 600 dpi resolution; line drawings must have a 1200 dpi resolution or their original file format, such as PowerPoint. Online figures should be provided only in PDF format as part of the online supplement file.

- Color figure charges are a flat per page rate of \$653 per color page.

-Please note that color figures cannot be changed to black and white after the manuscript is accepted. Please make any color changes to your figures during the final revision.

#### Online Supplement:

- Upload the online data supplement as one complete PDF labeled "Supplemental Material" at the top of the first page.

- Rename the supplemental figures and/or table with Roman numerals (i.e., Online Figure I, Online Table I, Online Figure II, Online Table II, etc.). Ensure that this change is made on the display item itself, in the legend, and throughout the text.

#### Other Items:

- All persons acknowledged by name in the manuscript must send an email to [CircRes@circresearch.org](mailto:CircRes@circresearch.org) citing their permission to be acknowledged.

-A Graphical Abstract (to be uploaded as a supplement): The intent of the graphical abstract is to provide readers with a succinct summary of the study in a form that facilitates its dissemination in presentations. It should emphasize the new findings in the paper. Do not include data items; all content should be graphical. The graphical abstract should conform to the following format: A single figure panel, no more than a 15 cm square (15 cm x 15 cm); Font: prefer a san serif font that is no less than 12 point. Please upload as a graphic abstract file in JPG file format.

- A supplement containing a short tweet that can be used to promote the article and a 1-2 line 'lay sentence' similar to those provided for NIH grants.

The Editors strongly encourage you to submit potential cover images. Appropriate figures should be both aesthetically beautiful and scientifically exciting. Potential cover images should be associated with the general topic of the paper, or may be altered/enhanced versions of an original figure within the manuscript. Potential cover figures should have a single panel, with no labels or text of any kind. The figure file should be supplied at exactly 8 1/8" width by 10 7/8" height. Please submit figure initially as a low-resolution PDF. Include a figure legend with the figure. If your figure is chosen, we will request a high-resolution version (minimum of 600 DPI, RGB color format, and TIF or EPS file format).

We look forward to receiving the final revised version of your manuscript as soon as possible. Thank you for contributing to Circulation Research.

Sincerely,

Jane E. Freedman, MD  
Editor-in-Chief  
Circulation Research  
An American Heart Association Journal

---

This e-mail message (including any attachments) is for the sole use of the intended recipient(s) and may contain confidential and privileged information. If the reader of this message is not the intended recipient, you are hereby notified that any dissemination, distribution or copying of this message (including any attachments) is strictly prohibited.

If you have received this message in error, please contact

the sender by reply e-mail message and destroy all copies of the original message (including attachments).
